# Supplementary material for: Repetitive transcranial magnetic stimulation for lower extremity motor function in patients with stroke: a systematic review and network meta-analysis
Source: PubMed Central journal article supplement — Neural Regen Res. 2020 Nov 27;16(6):1168–76. doi: 10.4103/1673-5374.300341 (PMC8224108; doi:10.4103/1673-5374.300341), 2020-11-27
Supplement: NRR-16-1168_Suppl1.pdf [file NRR-16-1168_Suppl1.pdf]

## Additional file 2 Search strategy

### MEDLINE (Ovid) 1946 - November (Week 3) 2019.

1. randomized controlled trial.pt.
2. controlled clinical trial.pt.
3. randomized.ab.
4. placebo.ab.
5. drug therapy.fs.
6. randomly.ab.
7. trial.ab.
8. groups.ab.
9. 1 or 2 or 3 or 4 or 5 or 6 or 7 or 8
10. exp animals/ not humans.sh.
11. 9 not 10
12. exp stroke/
13. "stroke\*".ab,ti.
14. 12 or 13
15. exp Transcranial Magnetic Stimulation/
16. exp Magnetic Field Therapy/
17. exp Magnetism/
18. exp Electromagnetic Fields/
19. exp Electromagnetic Phenomena/
20. ((magnet\$ or electromagnet\$) adj5 (stimulat\$ or field\$ or coil\$)).tw.
21. (TMS or rTMS).tw.
22. 15 or 16 or 17 or 18 or 19 or 20 or 21
23. 11 and 14 and 22

### EMBASE (Ovid) 1974 - November (Week 3) 2019.

1. random\$.mp. [mp=title, abstract, subject headings, heading word, drug trade name, original title, device manufacturer name]
2. factorial\$.mp. [mp=title, abstract, subject headings, heading word, drug trade name, original title, device manufacturer name]
3. (crossover\$ or cross over\$).mp. [mp=title, abstract, subject headings, heading word, drug trade name, original title, device manufacturer name]
4. placebo\$.mp. [mp=title, abstract, subject headings, heading word, drug trade name, original title, device manufacturer name]
5. (doubl\$ adj blind\$).mp. [mp=title, abstract, subject headings, heading word, drug trade name, original title, device manufacturer name]
6. (singl\$ adj blind\$).mp. [mp=title, abstract, subject headings, heading word, drug trade name, original title, device manufacturer name]
7. assign\$.mp. [mp=title, abstract, subject headings, heading word, drug trade name, original title, device manufacturer name]
8. allocat\$.mp. [mp=title, abstract, subject headings, heading word, drug trade name, original title, device manufacturer name]
9. volunteer\$.mp. [mp=title, abstract, subject headings, heading word, drug trade name, original title, device manufacturer name]
10. crossover procedure.sh.
11. Double blind Procedure.sh.
12. Randomized Controlled Trial.sh.

13. Single blind Procedure.sh.
14. 1 or 2 or 3 or 4 or 5 or 6 or 7 or 8 or 9 or 10 or 11 or 12 or 13
15. exp stroke/
16. stroke\*.mp.
17. 15 or 16
- 18.exp transcranial magnetic stimulation/
19. exp magnetic stimulation/ or magnetotherapy/ or magnetism/ or electromagnetic field/ or magnet/ or magnetic field/
20. "magnetic and electromagnetic equipment"/
21. ((magnet\$ or electromagnet\$ or electro magnet\$) adj5 (stimulat\$ or field\$ or coil\$)).tw.
22. (TMS or rTMS).tw.
23. 18 or 19 or 20 or 21 or 22
24. 14 and 17 and 23

**The Cochrane Library and The Cochrane Controlled Trials Register (Wiley online library) (Issue 1, 2012).**

- #1. 'cerebrovascular accident' or 'stroke\*'
- #2. 'repetitive transcranial magnetic stimulation' or 'brain stimulation' or 'noninvasive brain stimulation' or 'transcranial magnetic stimulation'
- #3. #1 and #2

**ISI Web of Science: Science Citation Index Expanded (SCI-EXPANDED) (1981 to November 2019), ISI Web of Science: Conference Proceedings Citation Index-Science (CPCI-S) (1982 to November 2019).**

- #1. TS=clinical trial\*
- #2. TS=research design
- #3. TS=comparative stud\*
- #4. TS=evaluation stud\*
- #5. TS=controlled trial\*
- #6. TS=follow-up stud\*
- #7. TS=prospective stud\*
- #8. TS=random\*
- #9. TS=placebo\*
- #10. TS=(single blind\*)
- #11. TS=(double blind\*)
- #12. #11 OR #10 OR #9 OR #8 OR #7 OR #6 OR #5 OR #4 OR #3 OR #2 OR #1
- #13. TS=(stroke)
- #14. TS=stroke\*
- #15. #13 OR #14
- #16. TS=transcranial magnetic stimulation
- #17. TS=(TMS or rTMS)
- #18. TS=(magnetic field therap\*)
- #19. TS=(electromagnetic fields\*)
- #20. #19 OR #18 OR #17 OR #16
- #21. #20 AND #15 AND #12

**The Chinese National Knowledge Infrastructure (CNKI).**

Keywords: stroke and magnetic stimulation

**PEDro (1929-2019).**

Searched using the term stroke and magnet.

**The Cochrane Controlled Trials Register.**

See the Cochrane Library.

**ClinicalTrials.gov.**

Searched using the terms "stroke" AND "(Magnetics OR Electromagnetics OR Electromagnetic Fields)".
